# Supplementary material
Source: PubMed Central journal article supplement (PMC4998993)
Supplement: supp_now031_now031supp_table1.pdf [file supp_now031_now031supp_table1.pdf]

| Hugo_Symbol    | Entrez_Gen | Chromosome | Start_position | End_position | Variant_Classification | Reference_Seq | Tumor_Seq | Tumor_Seq | Genome_Build      | Annotation       | Transcript_ID | Transcript_ID | Transcript_ID | cDNA_Change | Codon_Change          | Protein_Change | Other_Transcripts                               | Refseq_mRNA_Id |
|----------------|------------|------------|----------------|--------------|------------------------|---------------|-----------|-----------|-------------------|------------------|---------------|---------------|---------------|-------------|-----------------------|----------------|-------------------------------------------------|----------------|
| CTD-2192116.20 | 0          | 19         | 12691164       | 12691164     | 3'UTR                  | C             | C         | T         | g.chr19:12691164  | ENST000000000000 | -             | 0             | 625           |             |                       |                | ZNF490_ENST0000000311437.6_3'UTR                |                |
| AKR1A1         | 10327      | 1          | 46032770       | 46032770     | 3'UTR                  | C             | C         | T         | g.chr1:46032770   | ENST000000000000 | +             | 0             | 528           |             |                       |                | AKR1A1_ENST0000000351829.4_Intron1 AKR1A1_EN    |                |
| AKAP3          | 10566      | 12         | 4724854        | 4724854      | 3'UTR                  | G             | G         | A         | g.chr12:4724854   | ENST000000000000 | -             | 0             | 3137          |             |                       |                | AKAP3_ENST0000002288.NM_001278309.1             |                |
| FCER1A         | 2205       | 1          | 159277781      | 159277781    | 3'UTR                  | C             | C         | A         | g.chr1:159277781  | ENST000000000000 | +             | 0             | 932           |             |                       |                | FCER1A_ENST000000368.NM_002001.3                |                |
| ABL1           | 25         | 9          | 133761129      | 133761129    | 3'UTR                  | G             | G         | A         | g.chr9:133761129  | ENST000000000000 | +             | 0             | 3833          |             |                       |                | NM_005157.4                                     |                |
| OR2L13         | 284521     | 1          | 248262672      | 248262672    | 5'UTR                  | G             | G         | C         | g.chr1:248262672  | ENST000000000000 | +             | 0             | 332           |             |                       |                | OR2L13_ENST000000358.NM_175911.2                |                |
| Unknown        | 0          | 5          | 62072618       | 62072618     | IgR                    | G             | G         | A         |                   |                  |               |               |               |             |                       |                | IPO11 (148209 upstream): None (None downstream) |                |
| KCNIP3         | 30818      | 2          | 95976299       | 95976299     | Intron                 | T             | T         | G         | g.chr2:95976299   | ENST000000000000 | +             | 2             | 316           |             |                       |                | KCNIP3_ENST000000360.NM_013434.4                |                |
| CA8            | 767        | 8          | 61121269       | 61121269     | Intron                 | T             | T         | C         | g.chr8:61121269   | ENST000000000000 | -             | 8             | 1173          |             |                       |                | NM_004056.4                                     |                |
| SUMF2          | 25870      | 7          | 56140772       | 56140772     | Missense               | J_G           | G         | A         | g.chr7:56140772   | ENST000000000000 | +             | 3             | 395           | c.364G>A    | c.(364-366) p.E122K   |                | SUMF2_ENST000000437.NM_001042469.1 NM_C         |                |
| NR3C2          | 0          | 4          | 149357871      | 149357871    | Missense               | J_C           | C         | T         | g.chr4:149357871  | ENST000000000000 | -             | 2             | 504           | c.142G>A    | c.(142-144) p.V48I    |                | NR3C2_ENST000000511528.1_Missense_Mutation      |                |
| FRG1B          | 0          | 20         | 29628245       | 29628245     | Missense               | J_G           | G         | A         | g.chr20:29628245  | ENST000000000000 | +             | 6             | 627           | c.247G>A    | c.(247-249) p.A83T    |                | FRG1B_ENST000000358464.4_Missense_Mutation      |                |
| RTP4           | 64108      | 3          | 187086270      | 187086270    | Missense               | J_A           | A         | G         | g.chr3:187086270  | ENST000000000000 | +             | 1             | 151           | c.41A>G     | c.(40-42) p.E14G      |                | NM_022147.2                                     |                |
| CSMD1          | 64478      | 8          | 4495039        | 4495039      | Missense               | J_T           | T         | C         | g.chr8:4495039    | ENST000000000000 | -             | 2             | 682           | c.127A>G    | c.(127-129) p.I43V    |                | CSMD1_ENST000000400186.3_Missense_Mutation      |                |
| CTNNA2         | 1496       | 2          | 80136918       | 80136918     | Missense               | J_A           | A         | C         | g.chr2:80136918   | ENST000000000000 | +             | 11            | 1775          | c.1051A>C   | c.(1051-105) p.N351H  |                | CTNNA2_ENST000000496558.1_Missense_Mutatio      |                |
| CUL9           | 23113      | 6          | 43164595       | 43164595     | Missense               | J_G           | G         | A         | g.chr6:43164595   | ENST000000000000 | +             | 11            | 2882          | c.2798G>A   | c.(2797-27) p.R933H   |                | CUL9_ENST00000037264.NM_015089.2                |                |
| DYRK1B         | 9149       | 19         | 40318202       | 40318202     | Missense               | J_C           | C         | T         | g.chr19:40318202  | ENST000000000000 | -             | 7             | 1370          | c.902G>A    | c.(901-903) p.C301Y   |                | DYRK1B_ENST000000348817.3_Missense_Mutatio      |                |
| OTOF           | 9381       | 2          | 26697530       | 26697530     | Missense               | J_A           | A         | C         | g.chr2:26697530   | ENST000000000000 | -             | 26            | 3265          | c.3139T>G   | c.(3139-314) p.T1047V |                | OTOF_ENST00000033858.NM_194248.2                |                |
| BNC1           | 646        | 15         | 83933158       | 83933158     | Missense               | J_C           | C         | T         | g.chr15:83933158  | ENST000000000000 | -             | 4             | 930           | c.845G>A    | c.(844-846) p.G282E   |                | BNC1_ENST00000056970.NM_001717.3                |                |
| SEZ6L2         | 26470      | 16         | 29883824       | 29883824     | Missense               | J_G           | G         | A         | g.chr16:29883824  | ENST000000000000 | -             | 15            | 3039          | c.2512C>T   | c.(2512-251) p.R838W  |                | SEZ6L2_ENST0000005374.NM_001114099.2 NM_2       |                |
| CTSS           | 1520       | 1          | 150724429      | 150724429    | Missense               | J_A           | A         | G         | g.chr1:150724429  | ENST000000000000 | -             | 5             | 715           | c.455T>C    | c.(454-456) p.L152P   |                | CTSS_ENST000000480766.NM_001199739.1 NM_C       |                |
| CCDC181        | 57821      | 1          | 169391215      | 169391215    | Missense               | J_G           | G         | C         | g.chr1:169391215  | ENST000000000000 | -             | 4             | 961           | c.454C>G    | c.(454-456) p.L152V   |                | CCDC181_ENST000000367806.3_Missense_Mutati      |                |
| NEB            | 4703       | 2          | 152500345      | 152500345    | Missense               | J_T           | T         | G         | g.chr2:152500345  | ENST000000000000 | -             | 57            | 8145          | c.7943A>C   | c.(7942-794) p.D2648A |                | NEB_ENST000000604864.NM_001164507.1             |                |
| PHLPP2         | 23035      | 16         | 71712830       | 71712830     | Missense               | J_T           | T         | C         | g.chr16:71712830  | ENST000000000000 | -             | 7             | 1829          | c.1096A>G   | c.(1096-105) p.N366D  |                | PHLPP2_ENST000000567016.1_Missense_Mutatio      |                |
| GABRG2         | 0          | 5          | 161580192      | 161580192    | Missense               | J_T           | T         | G         | g.chr5:161580192  | ENST000000000000 | +             | 10            | 1706          | c.1246T>G   | c.(1246-124) p.C416G  |                | GABRG2_ENST00000036.NM_000816.3 NM_1985         |                |
| ATXN7L2        | 127002     | 1          | 110033878      | 110033878    | Missense               | J_G           | G         | A         | g.chr1:110033878  | ENST000000000000 | +             | 10            | 1708          | c.1693G>A   | c.(1693-165) p.V565M  |                | ATXN7L2_ENST000000405.NM_153340.4               |                |
| OR4P4          | 81300      | 11         | 55406231       | 55406231     | Missense               | J_T           | T         | C         | g.chr11:55406231  | ENST000000000000 | +             | 1             | 398           | c.398T>C    | c.(397-399) p.I133T   |                | NM_001004124.1                                  |                |
| FRG1B          | 0          | 20         | 29628243       | 29628243     | Missense               | J_T           | T         | C         | g.chr20:29628243  | ENST000000000000 | +             | 6             | 625           | c.245T>C    | c.(244-246) p.L82S    |                | FRG1B_ENST000000358464.4_Missense_Mutation      |                |
| CARM1          | 10498      | 19         | 11022906       | 11022906     | Missense               | J_C           | C         | T         | g.chr19:11022906  | ENST000000000000 | +             | 5             | 795           | c.605C>T    | c.(604-606) p.A202V   |                | CARM1_ENST000000344.NM_199141.1                 |                |
| MSLNL          | 401827     | 16         | 824911         | 824911       | Missense               | J_C           | C         | T         | g.chr16:824911    | ENST000000000000 | -             | 7             | 1660          | c.1661G>A   | c.(1660-166) p.R554Q  |                | MSLNL_ENST000000442466.1_Missense_Mutation      |                |
| DACH1          | 1820       | 13         | 72147042       | 72147042     | Missense               | J_G           | G         | A         | g.chr13:72147042  | ENST000000000000 | -             | 4             | 1657          | c.1235C>T   | c.(1234-12) p.T412I   |                | DACH1_ENST0000003131.NM_080759.4                |                |
| CDK5           | 1020       | 7          | 150754212      | 150754212    | Missense               | J_C           | C         | G         | g.chr7:150754212  | ENST000000000000 | -             | 2             | 754           | c.73G>C     | c.(73-75) p.Gap.E25Q  |                | CDK5_ENST00000029751.NM_004935.3                |                |
| MAZ            | 4150       | 16         | 29819095       | 29819095     | Missense               | J_A           | A         | C         | g.chr16:29819095  | ENST000000000000 | +             | 2             | 1095          | c.989A>C    | c.(988-990) p.D330A   |                | MAZ_ENST00000056340.NM_001042539.1              |                |
| NOP14          | 8602       | 4          | 2954016        | 2954016      | Missense               | J_G           | G         | A         | g.chr4:2954016    | ENST000000000000 | -             | 6             | 921           | c.856C>T    | c.(856-858) p.L286F   |                | NOP14_ENST000000502735.1_Missense_Mutatio       |                |
| PCDHGA2        | 0          | 5          | 140736478      | 140736478    | Missense               | J_G           | G         | A         | g.chr5:140736478  | ENST000000000000 | +             | 1             | 1711          | c.1711G>A   | c.(1711-17) p.G571S   |                | PCDHGA2_ENST00000003.NM_018917.2                |                |
| SLC25A11       | 8402       | 17         | 4843151        | 4843151      | Missense               | J_A           | A         | C         | g.chr17:4843151   | ENST000000000000 | -             | 1             | 395           | c.55T>G     | c.(55-57) p.Tc.p.S19A |                | SLC25A11_ENST0000005003.NM_001165417.1 NM_C     |                |
| SPHKAP         | 80309      | 2          | 228882624      | 228882624    | Missense               | J_C           | C         | A         | g.chr2:228882624  | ENST000000000000 | -             | 7             | 2992          | c.2946G>T   | c.(2944-294) p.K982N  |                | SPHKAP_ENST000000344.NM_001142644.1             |                |
| ATRNL1         | 26033      | 10         | 117221456      | 117221456    | Missense               | J_C           | C         | A         | g.chr10:117221456 | ENST000000000000 | +             | 22            | 3454          | c.3328C>A   | c.(3328-332) p.L110I  |                | ATRNL1_ENST000000423.NM_207303.2                |                |
| DTPY19L4       | 286148     | 8          | 95777417       | 95777417     | Missense               | J_G           | G         | C         | g.chr8:95777417   | ENST000000000000 | +             | 9             | 976           | c.877G>C    | c.(877-879) p.E293Q   |                | NM_181787.2                                     |                |
| DTNB           | 1838       | 2          | 25861940       | 25861940     | Nonsense               | J_G           | G         | A         | g.chr2:25861940   | ENST000000000000 | -             | 3             | 340           | c.91C>T     | c.(91-93) p.Cg.p.R31* |                | DTNB_ENST00000040718.NM_001256303.1 NM_C        |                |
| ARHGAP26       | 23092      | 5          | 142283200      | 142283200    | Nonsense               | J_C           | C         | A         | g.chr5:142283200  | ENST000000000000 | -             | 8             | 1153          | c.798C>A    | c.(796-798) p.Y266*   |                | ARHGAP26_ENST000000.NM_001135608.1              |                |
| RP11-707M1.1   | 0          | 11         | 49831701       | 49831701     | RNA                    | G             | G         | T         | g.chr11:49831701  | ENST000000000000 | +             | 0             | 1926          |             |                       |                |                                                 |                |
| HPCAL1         | 3241       | 2          | 10560207       | 10560207     | Silent                 | C             | C         | T         | g.chr2:10560207   | ENST000000000000 | +             | 4             | 850           | c.324C>T    | c.(322-324) p.Y108Y   |                | HPCAL1_ENST000000307.NM_134421.2                |                |
| MAGEA12        | 4111       | X          | 151900285      | 151900285    | Silent                 | G             | G         | A         | g.chrX:151900285  | ENST000000000000 | -             | 3             | 869           | c.516C>T    | c.(514-516) p.I172I   |                | MAGEA12_ENST00000003.NM_001166386.1             |                |
| ARHGAP15       | 55843      | 2          | 144525663      | 144525663    | Silent                 | C             | C         | A         | g.chr2:144525663  | ENST000000000000 | +             | 14            | 1517          | c.1350C>A   | c.(1348-135) p.I450I  |                | CTD-2252P21.1_ENST000000.NM_018460.3            |                |
| LY9            | 4063       | 1          | 160784539      | 160784539    | Silent                 | C             | C         | T         | g.chr1:160784539  | ENST000000000000 | +             | 4             | 1090          | c.1060C>T   | c.(1060-106) p.L354L  |                | LY9_ENST000000368035.NM_001261456.1 NM_C        |                |
| DPP9           | 91039      | 19         | 4689663        | 4689663      | Silent                 | G             | G         | A         | g.chr19:4689663   | ENST000000000000 | -             | 15            | 1945          | c.1668C>T   | c.(1666-166) p.L556L  |                | DPP9_ENST00000059467.NM_139159.4                |                |
| RAP1GAP        | 5909       | 1          | 21930202       | 21930202     | Silent                 | C             | C         | T         | g.chr1:21930202   | ENST000000000000 | -             | 16            | 1640          | c.1632G>A   | c.(1630-162) p.A544A  |                | RAP1GAP_ENST000000374761.2_Intron1 RAP1GAP      |                |
| ENOX2          | 10495      | X          | 129837113      | 129837113    | Silent                 | G             | G         | A         | g.chrX:129837113  | ENST000000000000 | -             | 5             | 582           | c.165C>T    | c.(163-165) p.A55A    |                | ENOX2_ENST0000004922.NM_182314.1                |                |
| IGSF3          | 3321       | 1          | 117122123      | 117122123    | Silent                 | T             | T         | A         | g.chr1:117122123  | ENST000000000000 | -             | 10            | 3990          | c.3225A>T   | c.(3223-322) p.T1075T |                | IGSF3_ENST00000036948.NM_001007237.1            |                |
| FAM160B2       | 64760      | 8          | 21959775       | 21959775     | Silent                 | G             | G         | A         | g.chr8:21959775   | ENST000000000000 | +             | 15            | 1987          | c.1941G>A   | c.(1939-194) p.P647P  |                | NM_022749.5                                     |                |
| BAZZA          | 11176      | 12         | 56993811       | 56993811     | Silent                 | C             | C         | T         | g.chr12:56993811  | ENST000000000000 | -             | 26            | 5071          | c.4872G>A   | c.(4870-487) p.Q1624Q |                | BAZZA_ENST000000549884.1_Silent_p.Q1654Q B      |                |
| TRPV5          | 56302      | 7          | 142626649      | 142626649    | Silent                 | G             | G         | A         | g.chr7:142626649  | ENST000000000000 | -             | 4             | 709           | c.361C>T    | c.(361-363) p.L121L   |                | TRPV5_ENST0000004426.NM_019841.4                |                |
| WSCD1          | 23302      | 17         | 5993659        | 5993659      | Silent                 | C             | C         | T         | g.chr17:5993659   | ENST000000000000 | +             | 4             | 951           | c.561C>T    | c.(559-561) p.G187G   |                | WSCD1_ENST000000317744.5_Silent_p.G187G W       |                |
| ENG            | 2022       | 9          | 130587621      | 130587621    | Silent                 | C             | C         | T         | g.chr9:130587621  | ENST000000000000 | -             | 6             | 985           | c.705G>A    | c.(703-705) p.T235T   |                | ENG_ENST000000373203.4_Silent_p.T235T           |                |
| HADHB          | 3032       | 2          | 26502095       | 26502095     | Silent                 | G             | G         | A         | g.chr2:26502095   | ENST000000000000 | +             | 9             | 827           | c.723G>A    | c.(721-723) p.Q241Q   |                | HADHB_ENST00000                                 |                |

| Refseq_prot_id                                                      | SwissProt_acc_id | SwissProt_entry_id | Description                                                          | UniProt_AApos |
|---------------------------------------------------------------------|------------------|--------------------|----------------------------------------------------------------------|---------------|
| ∑ST00000372070.3_intron                                             | P14550           | AK1A1_HUMAN        | aldo-keto reductase family 1, member A1 (aldehyde reductase)         |               |
| NP_001265238.1                                                      | O75969           | AKAP3_HUMAN        | A kinase (PRKA) anchor protein 3                                     |               |
| NP_001992.1                                                         | P12319           | FCERA_HUMAN        | Fc fragment of IgE, high affinity I, receptor for; alpha polypeptide |               |
| NP_005148.2                                                         | P00519           | ABL1_HUMAN         | c-abl oncogene 1, non-receptor tyrosine kinase                       |               |
| NP_787107.1                                                         | Q8N349           | OR2LD_HUMAN        | olfactory receptor, family 2, subfamily L, member 13                 |               |
| NP_038462.1                                                         | Q9Y2W7           | CSEN_HUMAN         | Kv channel interacting protein 3, calсенил                           |               |
| NP_004047.3                                                         | P35219           | CAH8_HUMAN         | carbonic anhydrase VIII                                              |               |
| NP_001035934.2 NP_056226Q8NBJ7                                      |                  | SUMF2_HUMAN        | sulfatase modifying factor 2                                         | 103           |
| ∫_p.V481 NR3C2_ENST000005.P08235                                    |                  | MCR_HUMAN          | nuclear receptor subfamily 3, group C, member 2                      | 48            |
| _p.A83T FRG1B_ENST00000439954.2_Missense_Mutation_p.A88T            |                  |                    |                                                                      |               |
| NP_071430.2                                                         | Q96DX8           | RTP4_HUMAN         | receptor (chemosensory) transporter protein 4                        | 14            |
| n_p.I43V CSMD1_ENST000001Q96P27                                     |                  | CSMD1_HUMAN        | CUB and Sushi multiple domains 1                                     | 43            |
| ∩n_p.N351H CTNNA2_ENST00CP26232                                     |                  | CTNA2_HUMAN        | catenin (cadherin-associated protein), alpha 2                       | 351           |
| NP_055904.1                                                         | Q8IWT3           | CUL9_HUMAN         | cullin 9                                                             | 933           |
| m_p.C301Y DYRK1B_ENST000Q9Y463                                      |                  | DYRK1B_HUMAN       | dual-specificity tyrosine-(Y)-phosphorylation regulated kinase       | 301           |
| NP_919224.1                                                         | Q9HC10           | OTOF_HUMAN         | otofelin                                                             | 1047          |
| NP_001708.3                                                         | Q01954           | BNC1_HUMAN         | basonuclein 1                                                        | 282           |
| NP_001107571.1 NP_963866Q6UXD5                                      |                  | SE6L2_HUMAN        | seizure related 6 homolog (mouse)-like 2                             | 838           |
| NP_001186668.1 NP_00407CP25774                                      |                  | CATS_HUMAN         | cathepsin 5                                                          | 152           |
| ion_p.L152V CCDC181_ENST00000491570.1_5'UTR CCDC181_ENST00000367805 |                  |                    | coiled-coil domain containing 181                                    |               |
| NP_001157979.1                                                      | P20929           | NEBU_HUMAN         | nebulin                                                              | 2648          |
| n_p.N401D PHLPP2_ENST000Q6ZVD8                                      |                  | PHLP2_HUMAN        | PH domain and leucine rich repeat protein phosphatase 2              | 366           |
| NP_000807.2 NP_944494.1                                             | P18507           | GBRG2_HUMAN        | gamma-aminobutyric acid (GABA) A receptor, gamma 2                   | 408           |
| NP_699171.3                                                         | Q576C5           | AT7L2_HUMAN        | ataxin 7-like 2                                                      | 565           |
| NP_001004124.1                                                      | Q8NGL7           | OR4P4_HUMAN        | olfactory receptor, family 4, subfamily P, member 4                  | 133           |
| _p.L82S FRG1B_ENST00000439954.2_Missense_Mutation_p.L87S            |                  |                    |                                                                      |               |
| NP_954592.1                                                         | Q86X55           | CARM1_HUMAN        | coactivator-associated arginine methyltransferase 1                  | 202           |
| ∫_p.R203Q                                                           | Q96KJ4           | MSLNL_HUMAN        | mesothelin-like                                                      | 203           |
| NP_542937.2                                                         | Q9UI36           | DACH1_HUMAN        | dachshund homolog 1 (Drosophila)                                     | 462           |
| NP_004926.1                                                         | Q00535           | CDK5_HUMAN         | cyclin-dependent kinase 5                                            | 25            |
| NP_001036004.1                                                      | P56270           | MAZ_HUMAN          | MYC-associated zinc finger protein (purine-binding transcript)       | 330           |
| ∫_p.L286F NOP14-AS1_ENST0P78316                                     |                  | NOP14_HUMAN        | NOP14 nucleolar protein                                              | 286           |
| NP_061740.1                                                         |                  |                    |                                                                      |               |
| NP_001158889.1 NP_003556Q02978                                      |                  | M2OM_HUMAN         | solute carrier family 25 (mitochondrial carrier; oxoglutarate t      | 19            |
| NP_001136116.1                                                      | Q2M3C7           | SPKAP_HUMAN        | SPHK1 interactor, AKAP domain containing                             | 982           |
| NP_997186.1                                                         | Q5VV63           | ATRNL1_HUMAN       | attractin-like 1                                                     | 1110          |
| NP_861452.2                                                         | Q7Z388           | D19L4_HUMAN        | dpy-19-like 4 (C. elegans)                                           | 293           |
| NP_001243232.1 NP_068707Q60941                                      |                  | DTNB_HUMAN         | dystrobrevin, beta                                                   | 31            |
| NP_001129080.1                                                      | Q9UNA1           | RHG26_HUMAN        | Rho GTPase activating protein 26                                     | 266           |
| NP_602293.1                                                         | P37235           | HPCL1_HUMAN        | hippocalcin-like 1                                                   | 108           |
| NP_001159858.1                                                      | P43365           | MAGAC_HUMAN        | melanoma antigen family A, 12                                        | 172           |
| NP_060930.3                                                         | Q53QZ3           | RHG15_HUMAN        | Rho GTPase activating protein 15                                     | 450           |
| NP_001248385.1 NP_002336Q9HBG7                                      |                  | LY9_HUMAN          | lymphocyte antigen 9                                                 | 354           |
| NP_631898.3                                                         | Q86TI2           | DPP9_HUMAN         | dipeptidyl-peptidase 9                                               | 527           |
| '_ENST00000374765.4_intron P47736                                   |                  | RPGP1_HUMAN        | RAP1 GTPase activating protein                                       | 460           |
| NP_872114.1                                                         | Q16206           | ENOX2_HUMAN        | ecto-NOX disulfide-thiol exchanger 2                                 | 55            |
| NP_001007238.1                                                      | O75054           | IGSF3_HUMAN        | immunoglobulin superfamily, member 3                                 | 1075          |
| NP_073586.5                                                         | Q86V87           | F16B2_HUMAN        | family with sequence similarity 160, member B2                       | 647           |
| AZ2A_ENST00000379441.3_Si Q9UIF9                                    |                  | BAZ2A_HUMAN        | bromodomain adjacent to zinc finger domain, 2A                       | 1656          |
| NP_062815.2                                                         | Q9NQA5           | TRPV5_HUMAN        | transient receptor potential cation channel, subfamily V, member 5   | 121           |
| 'SCD1_ENST00000573634.1_Si Q658N2                                   |                  | WSCD1_HUMAN        | WSC domain containing 1                                              | 187           |
|                                                                     | P17813           | EGLN_HUMAN         | endoglin                                                             | 235           |
| NP_000174.1                                                         | P55084           | ECHB_HUMAN         | hydroxyacyl-CoA dehydrogenase/3-ketoacyl-CoA thiolase/en             | 241           |
| NP_001193600.1 NP_078833Q7Z5B4                                      |                  | RIC3_HUMAN         | RIC3 acetylcholine receptor chaperone                                | 95            |
| NP_003667.1                                                         | O15121           | DEGS1_HUMAN        | delta(4)-desaturase, sphingolipid 1                                  | 75            |
| NP_005152.1                                                         | P35414           | APJ_HUMAN          | apelin receptor                                                      | 72            |
| NP_878919.2                                                         | Q658P3           | STEAP3_HUMAN       | STEAP family member 3, metalloredutase                               | 71            |
| NP_001186794.1 NP_078988Q96L93                                      |                  | KI16B_HUMAN        | kinesin family member 16B                                            | 1142          |
| ∫8_ENST00000405249.1_Silen O00222                                   |                  | GRM8_HUMAN         | glutamate receptor, metabotropic 8                                   | 103           |
| NP_115991.1                                                         | Q969M2           | CXA10_HUMAN        | gap junction protein, alpha 10, 62kDa                                | 456           |
| NP_003707.2                                                         | Q9ULU8           | CAPS1_HUMAN        | Ca++-dependent secretion activator                                   | 707           |
| NP_001121185.1                                                      | Q8WXF7           | ATLA1_HUMAN        | atlastin GTPase 1                                                    | 307           |
| NP_000259.1 NP_057502.2  P35240                                     |                  | MERL_HUMAN         | neurofibromin 2 (merlin)                                             | 38            |
